# Supplementary material for: Vaccine Against PCSK9 Improved Renal Fibrosis by Regulating Fatty Acid β‐Oxidation
Source: PubMed Central journal article supplement — J Am Heart Assoc. 2019 Dec 24;9(1):e014358. doi: 10.1161/JAHA.119.014358 (PMC6988173; doi:10.1161/jaha.119.014358), 2019-12-24
Supplement: JAH3-9-e014358-s001.pdf [file JAH3-9-e014358-s001.pdf]

# **SUPPLEMENTAL MATERIAL**

**Table S1. Detail information of primers.**

| <b>Gene</b>                    |         | <b>Sequence</b>               |
|--------------------------------|---------|-------------------------------|
| <b>LDLR</b>                    | Forward | 5'-CCTCAAGTACCTTGGTATGACGC-3' |
|                                | Reverse | 5'-GAGGCTGTCCGGTCAGGATG-3'    |
| <b>VLDLR</b>                   | Forward | 5'-GAGTCTGACTTCGTGTGCAAA-3'   |
|                                | Reverse | 5'-GAACCGTCTTCGCAATCAGGA-3'   |
| <b>SREBP1</b>                  | Forward | 5'-CAAGGCCATCGACTACATCCG-3'   |
|                                | Reverse | 5'-CACCACTTCGGGTTTCATGC-3'    |
| <b>SREBP2</b>                  | Forward | 5'-GCAGCAACGGGACCATTCT-3'     |
|                                | Reverse | 5'-CCCCATGACTAAGTCCTTCAACT-3' |
| <b>APOB</b>                    | Forward | 5'-TTGGCAAACCTGCATAGCATCC-3'  |
|                                | Reverse | 5'-TCAAATTGGGACTCTCCTTTAGC-3' |
| <b>PPAR<math>\alpha</math></b> | Forward | 5'-AGAGCCCCATCTGTCCTCTC-3'    |
|                                | Reverse | 5'-ACTGGTAGTCTGCAAAACCAAA-3'  |
| <b>PPAR<math>\gamma</math></b> | Forward | 5'-GGAAGACCACTCGCATTTCCTT-3'  |
|                                | Reverse | 5'-GTAATCAGCAACCATTGGGTCA-3'  |
| <b>PGC1</b>                    | Forward | 5'-TATGGAGTGACATAGAGTGTGCT-3' |
|                                | Reverse | 5'-CCACTTCAATCCACCCAGAAAG-3'  |
| <b>Acox1</b>                   | Forward | 5'-TAACTTCCTCACTCGAAGCCA-3'   |
|                                | Reverse | 5'-AGTTCCATGACCCATCTCTGTC-3'  |
| <b>Acox2</b>                   | Forward | 5'-CATCCAACGTGACCCAGTGT-3'    |
|                                | Reverse | 5'-AAATGCGTTCAGGACCGTCTT-3'   |

|                |         |                                |
|----------------|---------|--------------------------------|
| <b>Cpt1a</b>   | Forward | 5'-TGGCATCATCACTGGTGTGTT-3'    |
|                | Reverse | 5'-GTCTAGGGTCCGATTGATCTTTG-3'  |
| <b>Cpt2</b>    | Forward | 5'-CCTGCTCGCTCAGGATAAACA-3'    |
|                | Reverse | 5'-GTGTCTTCAGAAACCGCACTG-3'    |
| <b>CD36</b>    | Forward | 5'-ATGGGCTGTGATCGGAACTG-3'     |
|                | Reverse | 5'-GTCTTCCCAATAAGCATGTCTCC-3'  |
| <b>LPL</b>     | Forward | 5'-GGGAGTTTGGCTCCAGAGTTT-3'    |
|                | Reverse | 5'-TGTGTCTTCAGGGGTCCTTAG-3'    |
| <b>ABCA1</b>   | Forward | 5'-CAGATGAAGCAGTTTTTCAGTCCT-3' |
|                | Reverse | 5'-CACATTCCGGCTCTTTAGAAGG-3'   |
| <b>ABCG1</b>   | Forward | 5'-CTTTCCTACTCTGTACCCGAGG-3'   |
|                | Reverse | 5'-CGGGGCATTCCATTGATAAGG-3'    |
| <b>ACAT1</b>   | Forward | 5'-CAGGAAGTAAGATGCCTGGAAC-3'   |
|                | Reverse | 5'-TTCACCCCCTTGGATGACATT-3'    |
| <b>TGF-β</b>   | Forward | 5'-CCACCTGCAAGACCATCGAC-3'     |
|                | Reverse | 5'-CTGGCGAGCCTTAGTTTGGAC-3'    |
| <b>Smad3</b>   | Forward | 5'-CACGCAGAACGTGAACACC-3'      |
|                | Reverse | 5'-GGCAGTAGATAACGTGAGGGA-3'    |
| <b>Col-I</b>   | Forward | 5'-TAAGGGTCCCAATGGTGAGA-3'     |
|                | Reverse | 5'-GGGTCCCTCGACTCCTACAT-3'     |
| <b>Col-III</b> | Forward | 5'-CTGTAACATGGAAACTGGGGAAA-3'  |
|                | Reverse | 5'-CCATAGCTGAACTGAAAACCACC-3'  |

---

**Figure S1. PCSK9Q $\beta$ -003 vaccine decreased plasma TC in mice intervened by L-NAME.**

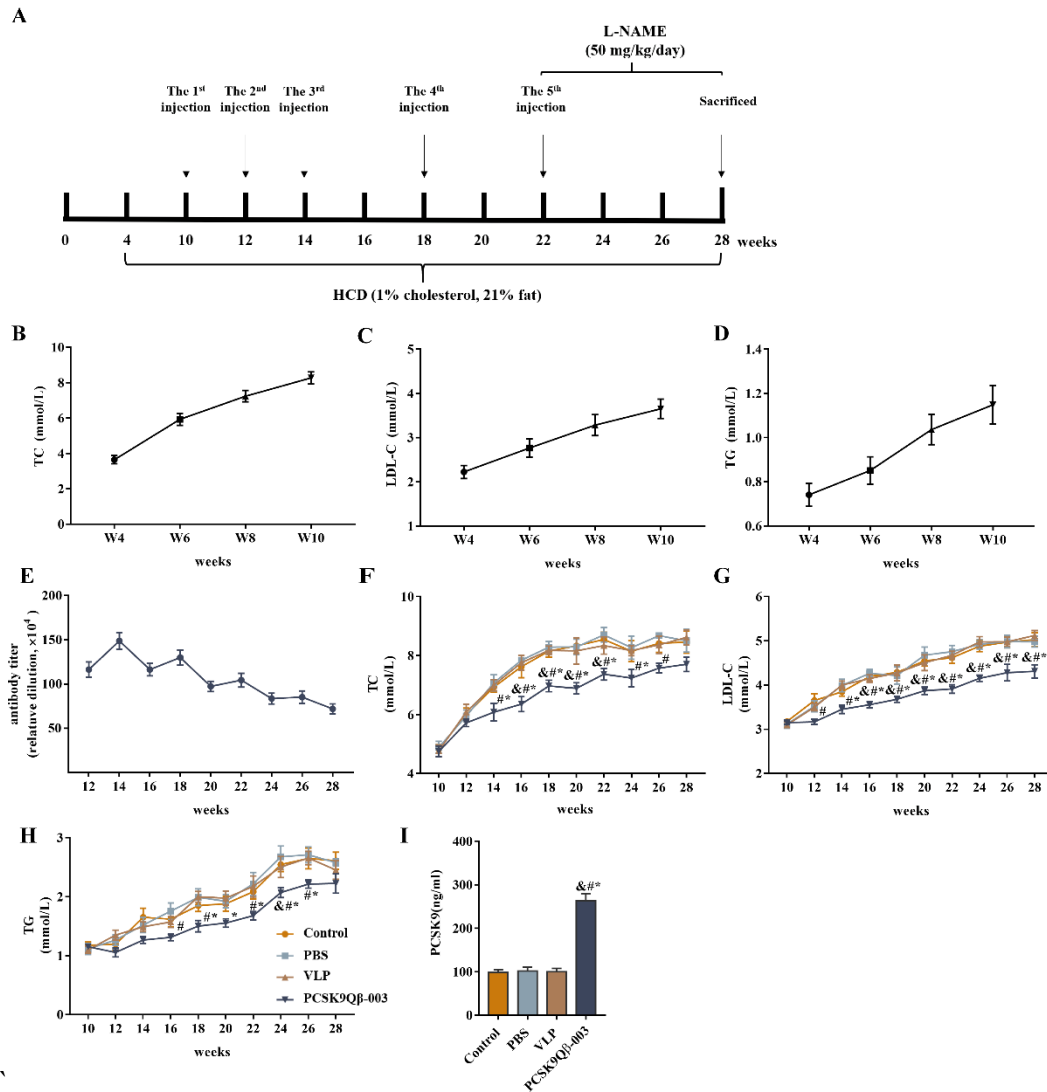

(A) Process of animal experiments in the LDLR<sup>+/-</sup> mice + L-NAME. (B-D) LDLR<sup>+/-</sup> mice fed with HCD presented changes of steadily increased blood lipid level. (E) The anti- PCSK9Q $\beta$ -003 titers were measured by ELISA. (F-H) The TC, LDL-C and TG was decreased in the PCSK9Q $\beta$ -003 vaccine group compared with the other groups. (I) The total PCSK9 level was significantly elevated in the PCSK9Q $\beta$ -003 vaccine group compared to the other groups. n = 6 per group. Data were expressed as means  $\pm$  SEM. &P<0.05 versus the Control group; #P<0.05 versus the PBS group; \*P<0.05 versus the Q $\beta$  virus-like particles group.

**Figure S2. PCSK9Q $\beta$ -003 vaccine decreased hepatic steatosis in mice induced by L-NAME.**

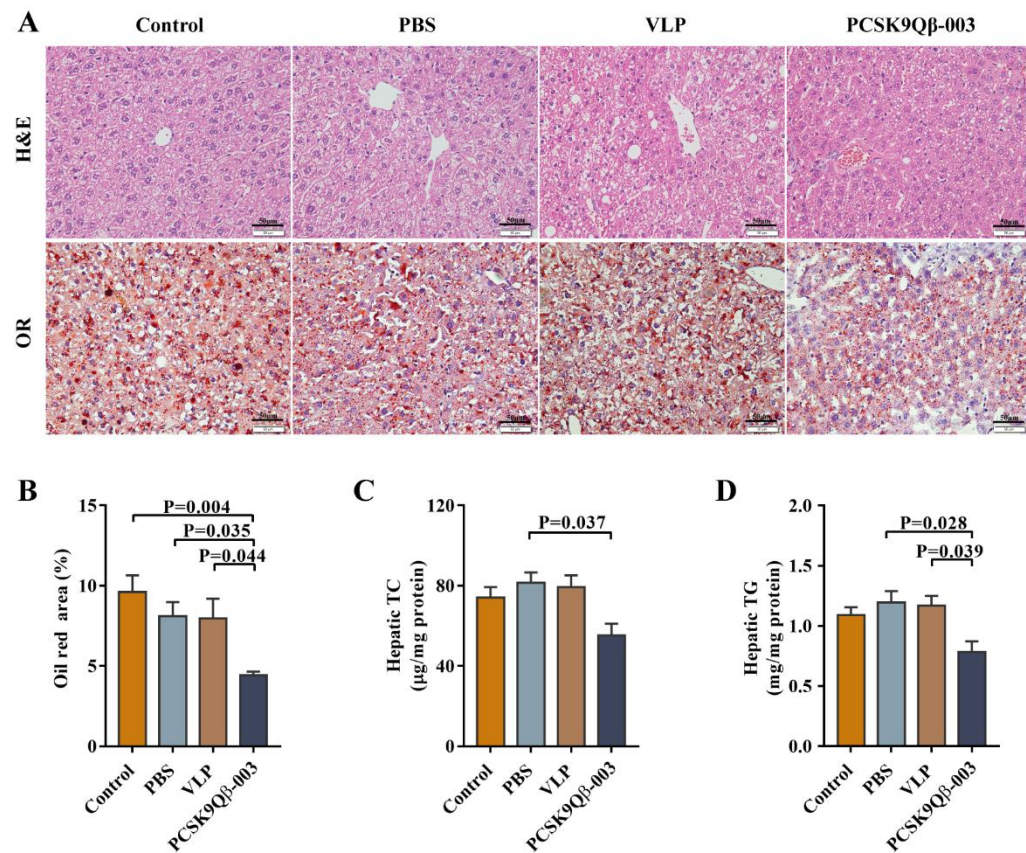

(A) Histology of the livers stained with H&E and Oil-red O (Bar 50= $\mu$ m). (B) Representative Oil Red O stained liver sections showed that the PCSK9Q $\beta$ -003 vaccine markedly prevented the formation of fatty liver. (C, D) Hepatic TC and TG contents. n = 6 per group. Data were expressed as means  $\pm$  SEM.
